# Supplementary material for: Phosphorothioated and phosphate-terminal dumbbell (PP-TD) probe-based rapid detection of polynucleotide kinase activity
Source: Royal Society of Chemistry journal article supplement (doi:10.1039/d2an01431a), 2022-01-01
Supplement: d2an01431a1.pdf [file d2an01431a1.pdf]

## Phosphorothioated and Phosphate-Terminal Dumbbell (PP-TD) Probe-Based Rapid Detection of Polynucleotide Kinase Activity

Xianfeng Jiang,<sup>a</sup> Xudan Shen,<sup>b</sup> Jadera Talap,<sup>b</sup> Dan Yang,<sup>b</sup> Su Zeng,<sup>b</sup> Hui Liu,<sup>\*a</sup> and Sheng Cai<sup>\*b</sup>

<sup>a</sup> Sir Run Run Shaw Hospital, School of Medicine, Zhejiang University, Hangzhou, Zhejiang 310020, China.

<sup>b</sup> Institute of Drug Metabolism and Pharmaceutical Analysis, Zhejiang Province Key Laboratory of Anti-Cancer Drug Research, College of Pharmaceutical Science, Zhejiang University, Hangzhou, Zhejiang 310058, China.

\* Corresponding author, E-mail: caisheng@zju.edu.cn, lhui2010@zju.edu.cn.

**Table S1. Sequence information in this study**

| Name        | Sequences                                                           |
|-------------|---------------------------------------------------------------------|
| PP-TD Probe | 5'- <u>AAGAATTCTTAAGAATTCTT</u> ACATCGTTACGTTAGTGAAAAACCACTAAC-3'P  |
| P-TD Probe  | 5'-AAGAATTCTTAAGAATTCTTACATCGTTACGTTAGTGAAAAACCACTAAC-3'OH          |
| Loop-6      | 5'-AAGAATTCTTAAGAATTCTTACATCGTTACGTTAGTGAAAAAACCACTAAC-3'P          |
| Loop-8      | 5'- <u>AAGAATTCTTAAGAATTCTT</u> ACATCGTTACGTTAGTGAAAAAACCACTAAC-3'P |
| Bridge-8    | 5'- <u>AAGAATTCTTAAGAATTCTT</u> ATCGTTACGTTAGTGAAAAACCACTAAC-3'P    |
| Bridge-12   | 5'-AAGAATTCTTAAGAATTCTTAAACATCGTTACGTTAGTGAAAAACCACTAAC-3'P         |

\* Underlined bases are phosphorothioate modified.

**Table S2. Comparison with other reported fluorescence methods**

| Reference                | Time (min) | Linear Range (U/ $\mu$ L)                     | LOD (U/ $\mu$ L)      |
|--------------------------|------------|-----------------------------------------------|-----------------------|
| (Li, Xu et al. 2017)     | 335        | $1.0 \times 10^{-7}$ to $1.0 \times 10^{-3}$  | $4.36 \times 10^{-8}$ |
| (Zhao, Liu et al. 2017)  | 280        | $5.0 \times 10^{-4}$ to $5.0 \times 10^{-2}$  | $2.0 \times 10^{-4}$  |
| (Feng, Wang et al. 2018) | 130        | $1.0 \times 10^{-5}$ to $3.0 \times 10^{-4}$  | $6.7 \times 10^{-6}$  |
| (Chen, Wang et al. 2019) | 185        | $1.0 \times 10^{-6}$ to $1.0 \times 10^{-5}$  | $7.9 \times 10^{-7}$  |
| (Jie, Li et al. 2019)    | 250        | $1.0 \times 10^{-6}$ to $1.0 \times 10^{-2}$  | $1.0 \times 10^{-6}$  |
| (Li, Ma et al. 2019)     | 60         | $1.0 \times 10^{-5}$ to $1.25 \times 10^{-2}$ | $1.0 \times 10^{-5}$  |
| (Zhang, Liu et al. 2019) | 190        | $7.0 \times 10^{-5}$ to $1.5 \times 10^{-2}$  | $6.0 \times 10^{-5}$  |
| (Zhou, Tong et al. 2019) | 200        | $1.0 \times 10^{-3}$ to $1.0 \times 10^{-1}$  | $2.0 \times 10^{-4}$  |
| (Wang, Wang et al. 2020) | 80         | $1.0 \times 10^{-8}$ to $2.5 \times 10^{-5}$  | $3.3 \times 10^{-9}$  |
| (Wu, He et al. 2020)     | 30         | $2.5 \times 10^{-4}$ to $1.0 \times 10^{-3}$  | $1.1 \times 10^{-4}$  |
| (Zhang, Fan et al. 2021) | 180        | $5.0 \times 10^{-10}$ to $5.0 \times 10^{-6}$ | $1.2 \times 10^{-10}$ |
| This work                | 105        | $1.0 \times 10^{-6}$ to $5.0 \times 10^{-5}$  | $7.7 \times 10^{-7}$  |

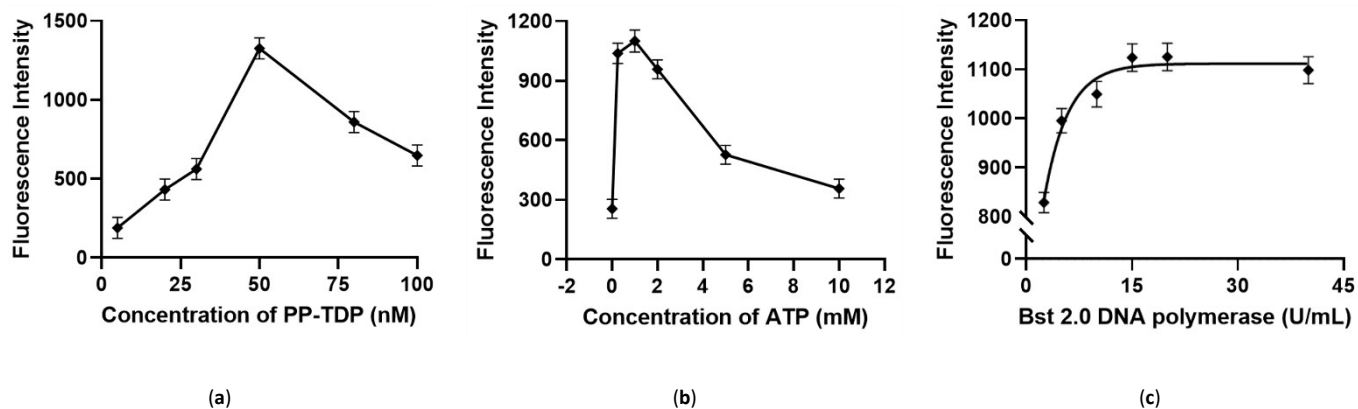

**Figure S1.** Optimization of the reaction conditions. (a) Fluorescence intensity vs. Concentration of PP-TD probe; (b) Fluorescence intensity vs. Concentration of ATP; (c) Fluorescence intensity vs. Concentration of Bst 2.0 DNA polymerase. The statistical data is presented as mean  $\pm$  S.D (n=3).

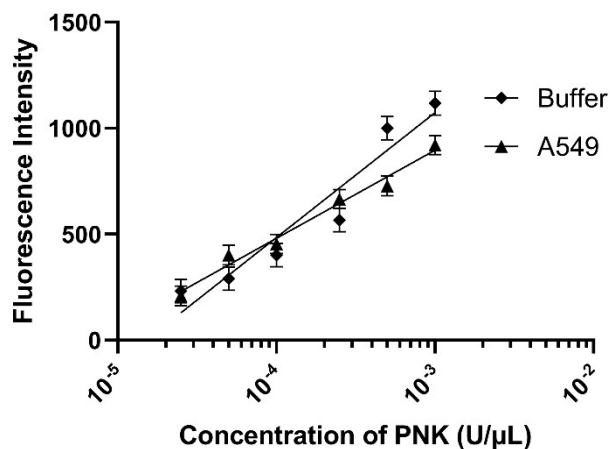

**Figure S2.** Quantitative detection in diluted cell extracts. The statistical data is presented as mean  $\pm$  S.D (n=3).

## References

- Chen, H., Z. Wang, X. Chen, K. Lou, A. Sheng, T. Chen, G. Chen and J. Zhang (2019). "New method for detection of T4 polynucleotide kinase phosphatase activity through isothermal EXponential amplification reaction." *Analyst* 144(6): 1955-1959.
- Feng, C., Z. Wang, T. Chen, X. Chen, D. Mao, J. Zhao and G. Li (2018). "A Dual-Enzyme-Assisted Three-Dimensional DNA Walking Machine Using T4 Polynucleotide Kinase as Activators and Application in Polynucleotide Kinase Assays (vol 90, pg 2810, 2018)." *Analytical Chemistry* 90(7): 4932-4932.
- Jie, G., C. Li, Y. Zhao, Q. Kuang and S. Niu (2019). "Fluorescent Mn: ZnCdS@ZnS and CdTe Quantum Dots Probes on 5102 Microspheres for Versatile Detection of Carcinoembryonic Antigen and Monitoring T4 Polynucleotide Kinase Activity." *ACS Applied Nano Materials* 2(7): 4637-4645.
- Li, J., J. Ma, Y. Zhang, Z. Zhang and G. He (2019). "A fluorometric method for determination of the activity of T4 polynucleotide kinase by using a DNA-templated silver nanocluster probe." *Microchimica Acta* 186(1): 48.
- Li, X., X. Xu, J. Song, Q. Xue, C. Li and W. Jiang (2017). "Sensitive detection of T4 polynucleotide kinase activity based on multifunctional magnetic probes and polymerization nicking reactions mediated hyperbranched rolling circle amplification." *Biosensors and Bioelectronics* 91: 631-636.

- 6 Wang, D.-X., J. Wang, Y.-C. Du, J.-Y. Ma, S.-Y. Wang, A.-N. Tang and D.-M. Kong (2020). "CRISPR/Cas12a-based dual amplified biosensing system for sensitive and rapid detection of polynucleotide kinase/phosphatase." *Biosensors and Bioelectronics* 168: 112556.
- 7 Wu, X., S. He and J. X. Zhao (2020). "Label-free fluorescence assay coupled exonuclease reaction and SYBR Green I for the detection of T4 polynucleotide kinase activity." *Analytical Methods* 12(6): 807-812.
- 8 Zhang, L., W. Fan, D. Jia, Q. Feng, W. Ren and C. Liu (2021). "Microchamber-Free Digital Flow Cytometric Analysis of T4 Polynucleotide Kinase Phosphatase Based on Single-Enzyme-to-Single-Bead Space-Confined Reaction." *Analytical Chemistry* 93(44): 14828-14836.
- 9 Zhang, X., Q. Liu, Y. Jin and B. Li (2019). "Determination of the activity of T4 polynucleotide kinase phosphatase by exploiting the sequence-dependent fluorescence of DNA-templated copper nanoclusters." *Microchimica Acta* 186(1): 3.
- 10 Zhao, H., Q. Liu, M. Liu, Y. Jin and B. Li (2017). "Label-free fluorescent assay of T4 polynucleotide kinase phosphatase activity based on G-quadruplexe-thioflavin T complex." *Talanta* 165: 653-658.
- 11 Zhou, H., C. Tong, W. Zou, Y. Yang, Y. Liu, B. Li, Y. Qin, W. Dang, B. Liu and W. Wang (2019). "A novel fluorescence method for activity assay and drug screening of T4 PNK by coupling rGO with ligase reaction." *Analyst* 144(4): 1187-1196.
